# Supplementary material for: Endo-lysosomal assembly variations among human leukocyte antigen class I (HLA class I) allotypes
Source: eLife. 2023 Feb 1;12:e79144. doi: 10.7554/eLife.79144 (PMC9917446; doi:10.7554/eLife.79144)
Supplement: Figure 1—source data 2. — Data for Figure 1D–F. Re-analyzed from previous studies (Rizvi et al., 2014; Geng et al., 2018; Sarkizova et al., 2020) to describe HLA-B assembly modes. [file elife-79144-fig1-data2.xlsx]

## Sheet: Sheet1
Figure 1--Source Data 2
Figure 1D-F: HLA-B tapasin-depndence, TAP-dependence, Shannon entropy
Allotype	Tapasin-dependence (MFI +tapasin/-tapasin)
B*35:01	0.419951
B*08:01	3.63869
B*44:02	4.75696
B*57:01	5.60559
Allotype	TAP-dependence (MFI +TAP/-TAP)
	W6/32	anti-HA
B*35:01	1.80157	1.45403
B*08:01	2.96274
B*57:01		6.40403
B*44:02	17.3565	13.6329
Allotype	Sum Shannon Entropy
B*08:01	24.5557
B*44:02	25.9081
B*35:01	27.4545
B*57:01	27.7686
