# Supplementary material for: Endo-lysosomal assembly variations among human leukocyte antigen class I (HLA class I) allotypes
Source: eLife. 2023 Feb 1;12:e79144. doi: 10.7554/eLife.79144 (PMC9917446; doi:10.7554/eLife.79144)
Supplement: Figure 1—source data 3. — Data for Figure 1H–I. Monocyte-derived dendritic cells were differentiated and pulsed with control (non-binding) peptide for 4 hr in the presence or absence of bafilomycin. Cells were stained with either BBM.1 (anti-β2m) or HC10 (anti-open human leukocyte antigen class I). [file elife-79144-fig1-data3.xlsx]

## Sheet: Sheet1
Figure 1--Source Data 3
Figure 1H-I: BBM.1 and HC10 +/- bafilomycin
moDCs were differentiated and pulsed with control (non-binding) peptide for 4 hours in the presence or absence of bafilomycin
Cells were stained with either BBM.1 (anti-beta2m) or HC10 (anti-open HLA-I)
BBM.1
Donor ID	untreated		bafilomycin
	rep 1	rep 2	rep 1	rep 2
94	26296	25737	18983	19497
121	21560	22332	19776	19370
148	35499	35066	27806	28684
130	26192	24197	20821	19949
166	21383	21566	12864	12033
121	28101	28753	21405	21694
105	49275	49962	25735	25058
178	59980	58481	27984	28293
148	38188	34809	33631	33279
24	20973	20699	14832	15649
210	31700	31787	22401	22782
24	20377	20339	15827	15327
210	33938	36091	23506	24214
210	23143	21806	17131	15621
24	23432	23246	22580	22008
HC10
Donor ID	untreated		bafilomycin
	rep 1	rep 2	rep 1	rep 2
9	7515	7521	8114	7965
130	3708	3720	3162	3164
166	6139	6172	5414	5375
121	6327	6329	5380	5365
105	4986	4996	4761	4684
178	4694	4705	4283	4281
148	6567	6475	6167	6215
210	6559	6576	7055	6986
168	13424	13136	18002	18252
24	5391	5211	4959	4960
210	6325	6334	6291	6366
187	4656	4591	5017	4986
