# Supplementary material for: Endo-lysosomal assembly variations among human leukocyte antigen class I (HLA class I) allotypes
Source: eLife. 2023 Feb 1;12:e79144. doi: 10.7554/eLife.79144 (PMC9917446; doi:10.7554/eLife.79144)
Supplement: Figure 2—source data 2. — Data for Figure 2C. Monocyte-derived dendritic cells were differentiated and plated into 96 well plates. Cells were cultured at 37°C, or for 1 or 2 hr at room temperature and 42°C. Cells were then stained with anti-Bw6 to measure surface HLA-B, and normalized to 37°C. [file elife-79144-fig2-data2.xlsx]

## Sheet: Sheet1
Figure 2--Source Data 2
Figure 2C: surface HLA-B thermal stability
moDCs were differentiated and plated into 96-well plates. Cells were cultured at 37C, or for 1 or 2 hrs at room temperature and 42C. Cells were then stained with anti-Bw6 to measure surface HLA-B, and normalized to 37C.
B*08:01
Donor ID	37C		RT 1 hr		RT 2 hr		42C 1 hr		42C 2 hr
	mean	SEM	mean	SEM	mean	SEM	mean	SEM	mean	SEM
121	1	0	1.36133	0.0926177	1.34507	0.0231967	1.00923	0.000423298	0.833136	0.00821199
198	1	0.152125	1.24656	0.134843	0.959404	0.103223	0.601606	0.0647144	0.579472	0.0763856
178	1	0.0197806	1.08503	0.0376747	0.902784	0.0261069	0.54203	0.0210757	0.546323	0.00779177
28	1	0.0916412	1.35416	0.0877529	1.18184	0.103363	0.936066	0.0728852	0.493722	0.032196
B*35:01
Donor ID	37C		RT 1 hr		RT 2 hr		42C 1 hr		42C 2 hr
	mean	SEM	mean	SEM	mean	SEM	mean	SEM	mean	SEM
210	1	0.0114594	0.94894	0.0192513	0.894772	0.00746469	0.677434	0.00720182	0.634976	0.0111878
24	1	0.0516645	0.880078	0.0346209	1.06426	0.0390477	0.850883	0.0479275	0.642801	0.0247976
187	1	0.0275669	0.986737	0.0225148	1.03593	0.0473578	0.52893	0.0158494	0.466092	0.0417447
274	1	0	1.19289	0.00455139	1.18893	0.027737	0.958874	0.00700057	0.273533	0.00346967
210	1	0.0762911	0.962048	0.0546926	0.936934	0.05203	0.623851	0.0450541	0.462645	0.0282609
24	1	0.477523	1.06984	0.381957	1.22549	0.413923	1.06199	0.359044	0.574487	0.194004
