# Supplementary material for: Endo-lysosomal assembly variations among human leukocyte antigen class I (HLA class I) allotypes
Source: eLife. 2023 Feb 1;12:e79144. doi: 10.7554/eLife.79144 (PMC9917446; doi:10.7554/eLife.79144)
Supplement: Figure 2—source data 3. — Data for Figure 2D. HLA-B monomers were loaded with low-affinity peptide and washed, then exchanged with either no peptide, medium-affinity peptide, or high-affinity peptide in pH 4, 5, 6, or 7 buffer. Monomers were then bound to streptavidin beads and stained with HC10. [file elife-79144-fig2-data3.xlsx]

## Sheet: Sheet1
Figure 2--Source Data 3
Figure 2D: HLA-B bead pH peptide exchange (HC10)
HLA-B monomers were loaded with low affinity peptide and washed, then exchanged with either no peptide, medium affinity peptide, or high affinity peptide in pH 4, 5, 6, or 7 buffer. Monomers were then bound to streptavidin beads and stained with HC10.
B*08:01
pH	DAN->no peptide			DAN->GPK			DAN->FLR
	mean	SEM	N	mean	SEM	N	mean	SEM	N
4	0	0	4	-84	217	2	2666.25	1792.75	2
5	0	0	4	167.5	117	2	6462.25	843.75	2
6	0	0	4	-2733.5	940.5	2	-16500.2	2736.75	2
7	0	0	4	-2169	856	2	-16973.2	2140.25	2
B*35:01
pH	APL->no peptide			APL->EPL			APL->HPV
	mean	SEM	N	mean	SEM	N	mean	SEM	N
4	0	0	2	-3687	4962.5	2	-1485.75	1414.25	2
5	0	0	2	-2261.25	2761.75	2	-1295.5	702.5	2
6	0	0	2	4292.25	2762.75	2	-12722.5	944	2
7	0	0	2	-7268	1199.5	2	-19521.2	2468.75	2
