# Supplementary material for: Endo-lysosomal assembly variations among human leukocyte antigen class I (HLA class I) allotypes
Source: eLife. 2023 Feb 1;12:e79144. doi: 10.7554/eLife.79144 (PMC9917446; doi:10.7554/eLife.79144)
Supplement: Figure 2—source data 4. — Data for Figure 2E–F. moDCs were pulsed with B*08:01 or B*35:01 specific or control peptides for 4 hr, followed by washing and staining with the HC10 antibody. Pulses were performed at 37 or 4 °C. [file elife-79144-fig2-data4.xlsx]

## Sheet: Sheet1
Figure 2--Source Data 4
Figure 2E-F: HLA-B peptide receptivity on moDCs
moDCs were pulsed with B*08:01 or B*35:01 specific or control peptides for 4 hrs, followed by washing and staining with the HC10 antibody. Pulses were performed at 37C or 4C
B*08:01
Donor ID	GPK/GPD 37C		FLR/FLD 37C		HSK/HSD 37C		HSK/HSD 4C
	mean	SEM	mean	SEM	mean	SEM	mean	SEM
121	0.978184	0.0157724			0.996537	0.00979424
94	0.98661	0.0239606			0.980385	0.0209402
237	1.00812	0.00802757			1.00433	0.00899565
178	1.01354	0.0113509			0.976643	0.0195803
130					0.937366	0.039556
198					0.945717	0.0405236
148					1.05276	0.0158587	1.0137	0.00991203
121					1.02224	0.0111935	1.01192	0.00220986
148					1.00782	0.0150909	0.996281	0.0476153
9			1.03305	0.0212198
130			1.02342	0.0167753
166			0.994233	0.0206423
121			1.01027	0.00569124
105			1.01673	0.00307861
178			0.995851	0.00627997
148			1.00406	0.00717557
B*35:01
Donor ID	EPL/EGL 37C		HPV/HGV 37C		HPV/HGV 4C
	mean	SEM	mean	SEM	mean	SEM
24	0.948276	0.0248574	0.833725	0.0223488
210	0.909487	0.00251136	0.901637	0.00249726
168	0.994322	0.042248	0.859752	0.0155032
24	0.943723	0.00521271	0.89285	0.0164598
187			0.889462	0.0652464
168			0.885255	0.0280923	0.958642	0.0176169
24			0.965736	0.00747699	0.965035	0.0171517
210			0.948814	0.0304593	0.967577	0.0297966
