# Supplementary material for: Endo-lysosomal assembly variations among human leukocyte antigen class I (HLA class I) allotypes
Source: eLife. 2023 Feb 1;12:e79144. doi: 10.7554/eLife.79144 (PMC9917446; doi:10.7554/eLife.79144)
Supplement: Figure 3—source data 1. — Data for Figure 3C–F. Monocytes or moDCs were plated onto poly-L-lysine-coated coverslips, fixed, and stained for Bw6 co-localization with either EEA1, Rab11, or LAMP1. Co-localization was assessed using object-based methods as described. [file elife-79144-fig3-data1.xlsx]

## Sheet: Sheet1
Figure 3--Source Data 1
Figure 3C-F: Monocyte and moDC object-based co-localization
Monocytes or moDCs were plated onto poly-L-lysine coated coverslips, fixed, and stained for Bw6 co-localization with either EEA1, Rab11, or LAMP1.
Monocyte B*08:01
Cell #	EEA1		Rab11		LAMP1
	Donor 130	Donor 148	Donor 178	Donor 130	Donor 55	Donor 178
1	0.187643	0.092084	0.486559	0.313462	0.390805	0.212611
2	0.0936886	0	0.220284	0	0.860558	0.921481
3	0.209231	0.580808	0.2955	0.670411	0.676116	0.884393
4	0.167894	0.194994	0.514371	0.0554926	0.108824	0
5	0.309682	0	0.761015	0.109739	0.516667	0.584926
6	0.042029	0.117182	0.0625937	0.0401302	0.526549	0.725217
7	0.0971576	0.0549986	0	0	0	0.320678
8	0.11336	0.710037	0.242537	0.0138772	0.0668546	0.178378
9	0.27159	0.354002	0.083871	0	0.319415	0.599062
10	0.0708682	0.0735294	0.0552651	0.608974	0.231111	0.289402
11	0.148225	0	0.199821	0.609562	0.555556	0.205323
12	0.211095	0.279659	0	0	0.207541	0.640188
13	0.477366	0.923077	0.495567	0.699789	0.431261	0.252632
14	0.0875048	0.0512951	0	0.826476	0.788571	0.842357
15	0.0586011	0.556891	0.179104	0	0.0643337	0
16	0.0522565	0	0		0.899816	0.715382
17	0.198044	0.15374	0.528926		0.256327	0.770616
18	0.228249	0.0195952	0.0948569		0.796465	0.542441
19	0.0313233	0.0818476	0		0.252956	0.545169
20	0.143202	0.092781	0		0.819714	0.146045
21	0.272541		0		0.848943	0.566432
22			0.207985		0.727564	0.478303
23			0.569835		1	0.779817
24			0.675532		0.741913	0.352201
25			0.62446		0.511222
26			0.975877		0.948834
27					0
28					0.512
Monocyte B*35:01
Cell #	EEA1		Rab11		LAMP1
	Donor 210	Donor 187	Donor 136	Donor 210	Donor 24	Donor 187	Donor 136
1	0.104777	0.144526	0	0.309175	0.237903	0.823232	0.419894
2	0.152378	0.240642	0.0595238	0.765772	0.910772	0.473668	0.593458
3	0.183082	0	0	0.736936	0.159501	0.922038	0.611146
4	0.133112	0.161134	0.467682	0	0.229424	0.938712	0.268482
5	0.148529	0	0.0560921	0.584112	0	0.283665	0.397571
6	0.349129	0.456044	0.803675	0.157793	0.824698	0	0.397632
7	0.128431	0.0105099	0	0.319801	0.940262	0.581644	0.590062
8	0.223176	0.771218	0.570628	0.181887	0.873828	0.935539	0
9	0.11495	0	0.751572	0.0981889	0.114379	0.832461	0
10	0.130706	0.0932577	0.334943	0	0.79744	1	0.804117
11	0.386179	0.246584	0.115503	0.402477	0.690738	0.0996743	0.74383
12	0.0881944	0.115754	0.109868	0.232133	0.32103	0.856238	0.119185
13	0	0.0612078	0.567031	0	0.224633	0.935802	0.337873
14	0.170199	0.424767	0.494257	0	0.889556	0.496023	0.809701
15	0.402261	0	0.970684	0.129587	0.0786765	0.486942	0
16	0.306865	0.0368098	0.0297542	0.350856	0.982872	0.656284	0.371168
17	0.11236	0.0589449	0.851578	0	0.376963	0.862981	0.122244
18	0.238766	0.2155	0.236782	0.133602	0.731061	0.835283	0.115676
19	0.226351	0.143555	0.5	0.189599	0.917738	0	0.487308
20	0.357513	0.240385	0.548771	0.383646	0.572941	0.453498	0.644048
21			0.137342		0.958533	0.689617	0.496817
22			0		1	0.784123	0.108144
23			0.105503		0.413478		0.0893142
24			0.235317		0.802022		0.444023
25			0.657361		0.643462		0.170213
26			0.366939
27			0.18968
28			0.0660241
moDC B*08:01
Cell #	EEA1			Rab11					LAMP1
	Donor 55	Donor 198	Donor 166	Donor 55	Donor 198	Donor 166	Donor 94	Donor 237	Donor 55	Donor 198	Donor 166	Donor 94	Donor 237
1	0.212766	0.0317435	0.00609851	0.0446532	0.101396	0.0200179	0.22708	0.12744	0.0683911	0.130809	0.0871828	0.0772828	0.0410765
2	0.0918953	0.0129293	0	0.307087	0.10693	0	0.422893	0.168768	0	0	0.0211407	0.182303	0.0321688
3	0.194147	0.039604	0	0.0985862	0.495247	0.112275	0.018159	0.160418	0.497499	0.143558	0.0649895	0.150381	0.0178205
4	0.363528	0.102403	0.0594228	0	0	0.186916	0.144155	0.160418	0	0	0.0735238	0.137222	0
5	0	0	0	0	0.0315443	0.0888105	0.260784	0.0562233	0.00578118	0	0.0708661	0.337215	0.00332226
6	0.231343	0	0	0.0423801	0	0.178988	0.203659	0.287518	0.14762	0.0649299	0	0.0579736	0.026545
7	0.641217	0.0211765	0.056686	0.381785	0.0247389	0.314136	0.134772	0.0828885	0	0	0.150189	0	0.0316869
8	0.261391	0.102628	0	0.0988217	0	0	0.433511	0.207239	0	0.219665	0	0.302338	0.34843
9	0.200924	0	0	0.114855	0.0456334	0.0940767	0.190284	0.00768269	0.0782095	0.0544612	0.0836317	0.456623	0.0988806
10	0.284483	0.280717	0	0	0.141335	0.49075	0.41525	0.416332	0.424303	0.0797414	0.0994002	0.0484367	0.165796
11	0.047663	0.230508	0.0806283	0.0776398	0	0.516975	0.312866	0.0833333	0.0647861	0	0.0287356	0.214992	0
12	0.119169	0.13679	0	0	0.127329	0.240699	0.198764	0.00857657	0.110688	0.0195638	0.0528211	0.11658	0.0152749
13	0	0.156146	0.0108949	0.27929	0.0188235	0	0.200695	0.0821779	0.395762	0.0812588	0.0200553	0	0.0232125
14	0.651976	0	0.0332192	0.0513047	0.0370504	0.0628882	0.0498737	0.109048	0.0124342	0	0	0.013842	0.156066
15	0.201722	0.0314465	0.0493601	0.100758	0.424615	0.229372	0.25951	0.093435	0.0790068	0	0.0105485	0.0967818	0.00933014
16		0.401381	0	0.02182	0.215859	0.0488215	0.224923	0.0520896	0.0867248	0.177923	0.0274301	0	0.0198007
17		0	0.0995792	0.14004	0.0418364	0.517375	0.190152	0.286541	0	0.156708	0.201246	0.0788591	0.035544
18		0.65812	0.0318452	0.680251	0.201729	0.0932755	0.229799	0.0477264	0.148243	0.0433557	0.0300656	0.0717968	0.0366214
19		0.0190409	0		0.0805921	0.027907	0.271744	0.126935	0.163269	0.00951302	0.0787004	0.156532	0
20		0.307809	0		0.192131	0.048011	0.244779	0.210311	0.143744	0.15933	0.0856063	0.0257848	0.113252
21			0				0.361341			0.0824866	0.0480769
22							0.270487
moDC B*35:01
Cell #	EEA1		Rab11				LAMP1
	Donor 24	Donor 187	Donor 24	Donor 187	Donor 187	Donor 168	Donor 24	Donor 187	Donor 187	Donor 168
1	0.079646	0.0346859	0.119744	0	0.355955	0.135351	0.0272692	0.0171801	0.0157773	0.0221157
2	0.0945574	0.268108	0.0250591	0	0.477387	0.0570648	0.0752517	0.0493073	0.0180706	0.0233152
3	0.0146089	0	0.0894454	0	0.0248344	0.0207341	0.0589667	0	0	0.00690489
4	0.0339559	0.04552	0.197293	0.0640394	0.167931	0.0947706	0.276555	0.0314919	0.0310697	0.106782
5	0.111355	0.0172666	0.0322052	0	0.13083	0.330172	0.165436	0	0	0
6	0	0.123651	0.059243	0.717532	0.364354	0.0989703	0.0170636	0.123788	0.0859073	0.030885
7	0.0240752	0	0.372059	0.44189	0.282317	0.174363	0	0.0452951	0.120345	0.0149205
8	0.150853	0.0331418	0.303639	0.127045	0.136364	0.0139481	0.0504677	0.188233	0	0.00528402
9	0.0258303	0.0209925	0.316491	0	0.0492521	0.0697499	0.125582	0.10622	0.0331064	0.032381
10	0	0	0.115175	0	0.10114	0.086237	0.0158009	0	0	0
11	0.127009	0	0	0.113402	0.316332	0.0287632	0	0.0348451	0	0.0431812
12	0.0220923	0.0258385	0.045417	0.055	0.332126	0.197234	0.0403675	0.190751	0.0525878	0.00806452
13	0.0792029	0.465093	0.159774	0.105263	0.152911	0.109784	0.0971402	0.0337108	0.0273381	0.0132955
14	0.274258	0	0	0	0.580835	0.192506	0.254717	0.0869786	0.12635	0
15	0	0.00499537	0.127075	0	0.0629936	0.151855	0.190847	0.0199194	0	0.0241521
16	0.0260723	0.0951276	0.0986796	0	0	0.363505	0.00457103	0.0529148	0	0
17	0.0374838	0	0.79476	0	0.152547	0.0953061	0.282919	0.15019	0.00788551	0.00254479
18		0.0251276	0.623529	0.0295636	0.0877922	0.210193	0.0849798	0.144157	0	0.0109141
19		0.0392884	0.132499	0.102382	0.0205264	0.124773		0.0386775	0.0569564	0
20		0.0308591	0.0517116	0	0.053696	0.132637		0	0	0.0391771
21			0.0204467		0.064395
22					0.345006
23					0.153649
24					0.0763507
