# Supplementary material for: Endo-lysosomal assembly variations among human leukocyte antigen class I (HLA class I) allotypes
Source: eLife. 2023 Feb 1;12:e79144. doi: 10.7554/eLife.79144 (PMC9917446; doi:10.7554/eLife.79144)
Supplement: Figure 3—source data 2. — Data for Figure 3—figure supplement 1. Data from Figure 3 analyzed with the JACOP plugin on FIJI to measure co-localization. [file elife-79144-fig3-data2.xlsx]

## Sheet: Sheet1
Figure 3--Source Data 2
Figure 3--supplement 1: Monocyte and moDC co-localization (Pearson's correlation)
Data from Figure 3 analyzed with the JACoP plugin on FIJI to measure co-localization.
Monocyte B*08:01
Cell #	EEA1		Rab11		LAMP1
	Donor 130	Donor 148	Donor 178	Donor 130	Donor 55	Donor 178
1	0.566	0.554	0.864	0.89	0.806	0.64
2	0.628	0.544	0.912	0.845	0.876	0.779
3	0.632	0.529	0.898	0.825	0.849	0.904
4	0.625	0.781	0.618	0.894	0.825	0.785
5	0.601	0.506	0.824	0.88	0.836	0.665
6	0.545	0.612	0.933	0.769	0.784	0.852
7	0.323	0.661	0.915	0.859	0.897	0.833
8	0.624	0.614	0.917	0.887	0.831	0.776
9	0.684	0.572	0.906	0.834	0.867	0.815
10	0.655	0.6	0.86	0.769	0.797	0.836
11	0.61	0.853	0.876	0.889	0.749	0.85
12	0.638	0.658	0.896	0.873	0.906	0.771
13	0.647	0.714	0.654	0.766	0.796	0.679
14	0.477	0.642	0.458	0.812	0.897	0.854
15	0.647	0.665	0.813	0.846	0.889	0.75
16	0.575	0.617	0.845		0.908	0.854
17	0.655	0.452	0.683		0.801	0.648
18	0.62	0.651	0.712		0.914	0.888
19	0.632	0.642	0.821		0.904	0.753
20	0.697	0.647	0.914		0.871	0.851
21	0.718		0.72		0.922	0.811
22			0.919		0.812	0.807
23			0.868		0.906	0.83
24			0.864		0.89	0.766
25			0.905		0.847
26			0.719		0.877
27					0.721
28					0.797
Monocyte B*35:01
Cell #	EEA1		Rab11		LAMP1
	Donor 210	Donor 187	Donor 136	Donor 210	Donor 24	Donor 187	Donor 136
1	0.579	0.538	0.918	0.806	0.866	0.795	0.828
2	0.58	0.674	0.935	0.882	0.915	0.858	0.895
3	0.643	0.847	0.905	0.872	0.91	0.83	0.8
4	0.679	0.513	0.926	0.853	0.776	0.945	0.846
5	0.645	0.665	0.618	0.84	0.93	0.916	0.772
6	0.595	0.58	0.918	0.868	0.861	0.633	0.833
7	0.695	0.639	0.913	0.669	0.898	0.938	0.751
8	0.645	0.622	0.845	0.824	0.86	0.896	0.758
9	0.613	0.759	0.898	0.874	0.844	0.887	0.764
10	0.605	0.624	0.889	0.823	0.844	0.919	0.8
11	0.67	0.72	0.899	0.883	0.799	0.91	0.697
12	0.704	0.644	0.912	0.863	0.89	0.878	0.8
13	0.68	0.595	0.884	0.868	0.941	0.884	0.757
14	0.7	0.704	0.911	0.856	0.911	0.871	0.841
15	0.856	0.549	0.92	0.699	0.923	0.94	0.814
16	0.599	0.758	0.894	0.897	0.892	0.874	0.755
17	0.625	0.69	0.887	0.874	0.795	0.908	0.74
18	0.684	0.656	0.887	0.894	0.917	0.886	0.887
19	0.673	0.72	0.856	0.869	0.893	0.685	0.788
20	0.645	0.765	0.816	0.845	0.913	0.937	0.767
21			0.83		0.86	0.891	0.744
22			0.788		0.934	0.904	0.802
23			0.601		0.88		0.805
24			0.886		0.886		0.8
25			0.908		0.906		0.762
26			0.839
27			0.875
28			0.876
moDC B*08:01
Cell #	EEA1			Rab11					LAMP1
	Donor 55	Donor 198	Donor 166	Donor 55	Donor 198	Donor 166	Donor 94	Donor 237	Donor 55	Donor 198	Donor 166	Donor 94	Donor 237
1	0.642	0.466	0.44	0.778	0.715	0.809	0.758	0.703	0.67	0.606	0.75	0.545	0.374
2	0.827	0.471	0.667	0.723	0.799	0.779	0.806	0.443	0.58	0.536	0.706	0.749	0.44
3	0.716	0.467	0.626	0.748	0.645	0.755	0.6	0.672	0.693	0.655	0.609	0.666	0.334
4	0.669	0.541	0.707	0.794	0.611	0.797	0.85	0.72	0.711	0.579	0.672	0.576	0.425
5	0.632	0.779	0.748	0.692	0.748	0.842	0.795	0.636	0.687	0.552	0.787	0.513	0.235
6	0.76	0.515	0.729	0.796	0.653	0.811	0.848	0.733	0.713	0.571	0.6	0.601	0.171
7	0.795	0.732	0.653	0.772	0.754	0.838	0.761	0.694	0.598	0.53	0.767	0.648	0.372
8	0.812	0.529	0.721	0.843	0.732	0.796	0.823	0.767	0.751	0.499	0.79	0.498	0.271
9	0.764	0.687	0.819	0.773	0.709	0.84	0.808	0.679	0.751	0.619	0.787	0.616	0.406
10	0.793	0.425	0.768	0.773	0.712	0.854	0.738	0.775	0.648	0.669	0.745	0.434	0.248
11	0.806	0.606	0.642	0.798	0.829	0.841	0.751	0.719	0.699	0.618	0.709	0.391	0.391
12	0.77	0.594	0.733	0.753	0.797	0.76	0.696	0.719	0.582	0.64	0.669	0.763	0.299
13	0.858	0.526	0.656	0.8	0.706	0.813	0.811	0.72	0.777	0.582	0.744	0.752	0.332
14	0.745	0.63	0.769	0.722	0.568	0.819	0.815	0.713	0.708	0.578	0.656	0.397	0.418
15	0.819	0.616	0.767	0.811	0.698	0.853	0.83	0.805	0.72	0.405	0.672	0.316	0.585
16		0.511	0.711	0.782	0.645	0.866	0.836	0.738	0.803	0.63	0.773	0.618	0.552
17		0.732	0.68	0.632	0.725	0.855	0.777	0.594	0.751	0.526	0.785	0.622	0.284
18		0.508	0.598	0.667	0.754	0.885	0.641	0.795	0.748	0.722	0.747	0.634	0.542
19		0.549	0.705		0.706	0.826	0.819	0.729	0.716	0.6	0.745	0.678	0.455
20		0.549	0.654		0.303	0.851	0.533	0.686	0.64	0.612	0.675	0.552	0.497
21			0.567				0.78			0.596	0.737
22							0.81
moDC B*35:01
Cell #	EEA1		Rab11				LAMP1
	Donor 24	Donor 187	Donor 24	Donor 187	Donor 187	Donor 168	Donor 24	Donor 187	Donor 187	Donor 168
1	0.664	0.752	0.682	0.822	0.795	0.604	0.565	0.585	0.285	0.218
2	0.753	0.868	0.516	0.885	0.848	0.779	0.53	0.702	0.419	0.179
3	0.769	0.706	0.614	0.894	0.71	0.583	0.592	0.645	0.496	0.356
4	0.739	0.708	0.587	0.835	0.66	0.63	0.612	0.651	0.288	0.295
5	0.696	0.814	0.726	0.912	0.637	0.703	0.759	0.79	0.471	0.273
6	0.751	0.589	0.777	0.873	0.745	0.773	0.522	0.646	0.489	0.096
7	0.744	0.707	0.823	0.885	0.677	0.605	0.669	0.675	0.425	0.147
8	0.771	0.648	0.795	0.784	0.752	0.563	0.638	0.702	0.276	0.184
9	0.72	0.523	0.789	0.729	0.736	0.709	0.528	0.693	0.515	0.238
10	0.723	0.644	0.796	0.863	0.826	0.677	0.659	0.647	0.502	0.233
11	0.704	0.62	0.722	0.851	0.698	0.574	0.732	0.664	0.418	0.135
12	0.656	0.709	0.68	0.838	0.815	0.623	0.649	0.734	0.451	0.487
13	0.724	0.832	0.725	0.884	0.801	0.719	0.558	0.81	0.492	0.129
14	0.717	0.667	0.724	0.898	0.782	0.671	0.591	0.648	0.571	0.447
15	0.733	0.406	0.753	0.906	0.709	0.675	0.604	0.632	0.646	0.32
16	0.648	0.62	0.76	0.874	0.812	0.679	0.32	0.539	0.463	0.173
17	0.73	0.698	0.764	0.816	0.72	0.664	0.656	0.745	0.485	0.231
18		0.74	0.776	0.84	0.741	0.721	0.578	0.742	0.271	0.312
19		0.675	0.679	0.899	0.735	0.621		0.734	0.382	0.242
20		0.422	0.733	0.842	0.783	0.607		0.685	0.246	0.237
21			0.793		0.908
22					0.787
23					0.662
24					0.782
