# Supplementary material for: Endo-lysosomal assembly variations among human leukocyte antigen class I (HLA class I) allotypes
Source: eLife. 2023 Feb 1;12:e79144. doi: 10.7554/eLife.79144 (PMC9917446; doi:10.7554/eLife.79144)
Supplement: Figure 4—figure supplement 1—source data 1. — Data for Figure 4—figure supplement 1A–B. Monocytes or moDCs were treated with MG132 for 1 or 4 hr, followed by staining with anti-Bw6 antibody. Expression normalized to untreated cells. [file elife-79144-fig4-figsupp1-data1.xlsx]

## Sheet: Sheet1
Figure 4--Source Data 4
Figure 4-supplement 1A-B: Monocyte and moDC MG132 time course
Monocytes or moDCs were treated with MG132 for 1 or 4 hrs, followed by staining with anti-Bw6 antibody.
B*08:01 Monocytes
Donor ID	untreated		1 hr		4 hr
	mean	SEM	mean	SEM	mean	SEM
137	1	0.137806	0.956551	0.0937048	0.630051	0.0614539
55	1	0.064189	0.926936	0.0421304	0.766104	0.0570948
121	1	0.00706282	0.839351	0.0118337	0.574022	0.00819598
B*35:01 Monocytes
Donor ID	untreated		1 hr		4 hr
	mean	SEM	mean	SEM	mean	SEM
24	1	0.0415369	0.900007	0.0272893	0.792362	0.0574035
210	1	0.195323	0.94306	0.141265	0.922299	0.130999
136	1	0.0257059	0.930439	0.0972839	0.772973	0.0363809
B*08:01 moDCs
Donor ID	untreated		1 hr		4 hr
	mean	SEM	mean	SEM	mean	SEM
55	1	0.00405857	0.97914	0.00549428	0.755323	0.00671627
198	1	0.0216964	0.889775	0.0449885	0.789609	0.0126325
55	1	0.0545698	1.03134	0.0421482	0.889481	0.043079
166	1	0.00279736	1.06847	0.00289472	0.8636	0.00949792
B*35:01 moDCs
Donor ID	untreated		1 hr		4 hr
	mean	SEM	mean	SEM	mean	SEM
MS24 (B*35:01)	1	0.0020762	0.952953	0.00638883	0.927792	0.0175346
MS24 (B*35:01)	1	0.00832854	0.958052	0.00712096	0.912966	0.00886442
GC187 (B*35:01)	1	0.0208202	0.969797	0.0166203	0.901208	0.0141735
