# Supplementary material for: Endo-lysosomal assembly variations among human leukocyte antigen class I (HLA class I) allotypes
Source: eLife. 2023 Feb 1;12:e79144. doi: 10.7554/eLife.79144 (PMC9917446; doi:10.7554/eLife.79144)
Supplement: Figure 4—figure supplement 1—source data 2. — Data for Figure 4—figure supplement 1D–F. Monocyte-derived dendritic cells were treated with bafilomycin for 4 hr, and co-localization of Bw6 with Rab11 or LAMP1 was measured. Object-based co-localization and Pearson’s correlation were both used. [file elife-79144-fig4-figsupp1-data2.xlsx]

## Sheet: Sheet1
Figure 4--Source Data 5
Figure 4--supplement 1D-F: supplemental confocal co-localization data.
moDCs were treated with bafilomycin for 4 hrs, and co-localization of Bw6 with Rab11 or LAMP1 was measured. Object-based co-localization and Pearson's correlation were both used.
B*08:01 moDCs (Rab11): object-based co-localization
Cell #	untreated		bafilomycin
	Donor 94	Donor 237	Donor 94	Donor 237
1	0.22708	0.12744	0.281991	0.0907744
2	0.422893	0.168768	0.104638	0.340201
3	0.018159	0.160418	0.548584	0.162085
4	0.144155	0.160418	0.142914	0.757511
5	0.260784	0.0562233	0.291653	0
6	0.203659	0.287518	0.300464	0.342159
7	0.134772	0.0828885	0.607327	0.151071
8	0.433511	0.207239	0.5239	0.379658
9	0.190284	0.00768269	0.59439	0.427443
10	0.41525	0.416332	0.538707	0.167228
11	0.312866	0.0833333	0.247075	0.0241357
12	0.198764	0.00857657	0.390584	0.189719
13	0.200695	0.0821779	0.366829	0.0499401
14	0.0498737	0.109048	0.289439	0.30735
15	0.25951	0.093435	0.381782	0.0904475
16	0.224923	0.0520896	0.658913	0.294118
17	0.190152	0.286541	0.572785	0.235807
18	0.229799	0.0477264	0.87739	0.268919
19	0.271744	0.126935	0.754483	0.361859
20	0.244779	0.210311	0.334107	0.33607
21	0.361341		0.40252
22	0.270487		0.455099
B*35:01 moDCs (Rab11): object-based co-localization
Cell #	untreated		bafilomycin
	Donor 187	Donor 168	Donor 187	Donor 168
1	0.355955	0.135351	0.00433504	0.618712
2	0.477387	0.0570648	0.137418	0.11182
3	0.0248344	0.0207341	0.136545	0.0236503
4	0.167931	0.0947706	0.0239686	0.168535
5	0.13083	0.330172	0.0742291	0.215399
6	0.364354	0.0989703	0.022313	0.0899976
7	0.282317	0.174363	0.0474805	0.168644
8	0.136364	0.0139481	0.302789	0.00632127
9	0.0492521	0.0697499	0.140063	0.0595432
10	0.10114	0.086237	0.207248	0.181564
11	0.316332	0.0287632	0.0504508	0.120992
12	0.332126	0.197234	0.00545951	0.296192
13	0.152911	0.109784	0.259982	0.16784
14	0.580835	0.192506	0.223162	0.361111
15	0.0629936	0.151855	0.0468898	0.28132
16	0	0.363505	0.0284996	0.241525
17	0.152547	0.0953061	0.0305063	0.183316
18	0.0877922	0.210193	0.0324966	0.311275
19	0.0205264	0.124773	0.176704	0.452957
20	0.053696	0.132637	0.109566	0.353647
21	0.064395			0.997101
22	0.345006			0.152919
23	0.153649			0.1075
24	0.0763507			0.161579
B*08:01 moDCs (Rab11): Pearson's correlation
Cell #	untreated		bafilomycin
	Donor 94	Donor 237	Donor 94	Donor 237
1	0.758	0.703	0.653	0.749
2	0.806	0.443	0.801	0.771
3	0.6	0.672	0.868	0.795
4	0.85	0.72	0.817	0.763
5	0.795	0.636	0.813	0.766
6	0.848	0.733	0.666	0.703
7	0.761	0.694	0.733	0.805
8	0.823	0.767	0.677	0.791
9	0.808	0.679	0.699	0.769
10	0.738	0.775	0.578	0.764
11	0.751	0.719	0.837	0.81
12	0.696	0.719	0.653	0.842
13	0.811	0.72	0.58	0.68
14	0.815	0.713	0.588	0.837
15	0.83	0.805	0.693	0.831
16	0.836	0.738	0.706	0.838
17	0.777	0.594	0.838	0.792
18	0.641	0.795	0.796	0.838
19	0.819	0.729	0.797	0.746
20	0.533	0.686	0.647	0.663
21	0.78		0.795
22	0.81		0.848
B*35:01 moDCs (Rab11): Pearson's correlation
Cell #	untreated		bafilomycin
	Donor 187	Donor 168	Donor 187	Donor 168
1	0.795	0.604	0.599	0.768
2	0.848	0.779	0.611	0.678
3	0.71	0.583	0.625	0.626
4	0.66	0.63	0.669	0.672
5	0.637	0.703	0.609	0.761
6	0.745	0.773	0.477	0.62
7	0.677	0.605	0.789	0.763
8	0.752	0.563	0.808	0.706
9	0.736	0.709	0.726	0.814
10	0.826	0.677	0.778	0.758
11	0.698	0.574	0.754	0.762
12	0.815	0.623	0.57	0.66
13	0.801	0.719	0.716	0.823
14	0.782	0.671	0.548	0.778
15	0.709	0.675	0.743	0.735
16	0.812	0.679	0.742	0.803
17	0.72	0.664	0.616	0.755
18	0.741	0.721	0.748	0.809
19	0.735	0.621	0.729	0.837
20	0.783	0.607	0.824	0.835
21	0.908			0.82
22	0.787
23	0.662
24	0.782
B*08:01 moDCs (LAMP1): Pearson's correlation
Cell #	untreated		bafilomycin
	Donor 94	Donor 237	Donor 94	Donor 237
1	0.545	0.374	0.756	0.524
2	0.749	0.44	0.703	0.52
3	0.666	0.334	0.674	0.473
4	0.576	0.425	0.626	0.652
5	0.513	0.235	0.695	0.6
6	0.601	0.171	0.662	0.364
7	0.648	0.372	0.696	0.548
8	0.498	0.271	0.374	0.482
9	0.616	0.406	0.575	0.659
10	0.434	0.248	0.648	0.377
11	0.391	0.391	0.723	0.407
12	0.763	0.299	0.568	0.695
13	0.752	0.332	0.636	0.576
14	0.397	0.418	0.642	0.399
15	0.316	0.585	0.501	0.422
16	0.618	0.552	0.573	0.447
17	0.622	0.284	0.397	0.662
18	0.634	0.542	0.708	0.626
19	0.678	0.455	0.471	0.635
20	0.552	0.497	0.254	0.697
21			0.377	0.656
22			0.541	0.738
B*35:01 moDCs (LAMP1): Pearson's correlation
Cell #	untreated		bafilomycin
	Donor 187	Donor 168	Donor 187	Donor 168
1	0.285	0.218	0.431	0.662
2	0.419	0.179	0.302	0.655
3	0.496	0.356	0.414	0.615
4	0.288	0.295	0.664	0.515
5	0.471	0.273	0.585	0.62
6	0.489	0.096	0.74	0.683
7	0.425	0.147	0.671	0.359
8	0.276	0.184	0.568	0.448
9	0.515	0.238	0.647	0.615
10	0.502	0.233	0.651	0.549
11	0.418	0.135	0.736	0.625
12	0.451	0.487	0.756	0.449
13	0.492	0.129	0.814	0.261
14	0.571	0.447	0.831	0.35
15	0.646	0.32	0.68	0.356
16	0.463	0.173	0.514	0.577
17	0.485	0.231	0.549	0.634
18	0.271	0.312	0.551	0.506
19	0.382	0.242	0.64
20	0.246	0.237	0.651
21			0.699
22
23
24
