# Supplementary material for: Endo-lysosomal assembly variations among human leukocyte antigen class I (HLA class I) allotypes
Source: eLife. 2023 Feb 1;12:e79144. doi: 10.7554/eLife.79144 (PMC9917446; doi:10.7554/eLife.79144)
Supplement: Figure 4—figure supplement 1—source data 3. — Data for Figure 4—figure supplement 1G. HLA-B monomers were loaded with low-affinity peptide and washed, then exchanged with either no peptide, medium-affinity peptide, or high-affinity peptide in pH 4, 5, 6, or 7 buffer. Monomers were then bound to streptavidin beads and stained with BBM.1. [file elife-79144-fig4-figsupp1-data3.xlsx]

## Sheet: Sheet1
Figure 4--Source Data 6
Figure 4--supplement 1G: HLA-B bead pH peptide exchange (BBM.1)
HLA-B monomers were loaded with low affinity peptide and washed, then exchanged with either no peptide, medium affinity peptide, or high affinity peptide in pH 4, 5, 6, or 7 buffer. Monomers were then bound to streptavidin beads and stained with BBM.1.
B*08:01
pH	DAN->no peptide			DAN->RAK			DAN->FLR
	mean	SEM	N	mean	SEM	N	mean	SEM	N
4	0	0	4	303.75	394.75	2	2813	1309.5	2
5	0	0	4	981.5	245	2	7309.5	2990	2
6	0	0	4	5604.5	1622.5	2	3563.25	1204.25	2
7	0	0	4	7856.75	3669.25	2	3354.5	1765	2
B*35:01
pH	APL->no peptide			APL->EPL			APL->HPV
	mean	SEM	N	mean	SEM	N	mean	SEM	N
4	0	0	4	99	81	2	10826.8	404.75	2
5	0	0	4	224.25	1.75	2	13728.5	551.5	2
6	0	0	4	5481	1799.5	2	14778.5	995	2
7	0	0	4	4989.5	555.5	2	11559.8	538.75	2
