# Supplementary material for: Endo-lysosomal assembly variations among human leukocyte antigen class I (HLA class I) allotypes
Source: eLife. 2023 Feb 1;12:e79144. doi: 10.7554/eLife.79144 (PMC9917446; doi:10.7554/eLife.79144)
Supplement: Figure 4—figure supplement 1—source data 4. — Data for Figure 4—figure supplement 1H–I. moDCs were pulsed with specific or control peptides in the presence or absence of bafilomycin. Cells were stained with BBM.1 antibody. [file elife-79144-fig4-figsupp1-data4.xlsx]

## Sheet: Sheet1
Figure 4--Source Data 7
Figure 4--supplement 1H-I: moDC peptide receptivity (BBM.1)
moDCs were pulsed with specific or control peptides in the presence or absence of bafilomycin. Cells were stained with BBM.1 antibody.
B*08:01
Donor ID	RAK/RAD untreated		RAK/RAD bafilomycin		FLR/FLD untreated		FLR/FLD bafilomycin
	mean	SEM	mean	SEM	mean	SEM	mean	SEM
94	1.07186	0.0166813	1.06489	0.0212021
121	1.14549	0.0221696	1.04419	0.0119963
148	0.970297	0.00896549	1.00092	0.0260168
130					1.06063	0.0431397	1.06139	0.0284778
166					1.00855	0.0046836	1.08865	0.0363377
121					1.01027	0.00569124	0.999069	0.00337304
105					0.91089	0.0219652	0.999803	0.0290477
178					0.925832	0.03799	1.00583	0.0148043
148					1.0384	0.048354	0.951233	0.0701682
B*35:01
Donor ID	HPV/HGV untreated		HPV/HGV bafilomycin
	mean	SEM	mean	SEM
24	0.990274	0.021682	0.968415	0.0177954
210	0.941967	0.0351661	1.05589	0.0164726
210	0.991123	0.0355129	1.05053	0.0489895
24	1.01849	0.00926937	1.0704	0.028411
