# Supplementary material for: Endo-lysosomal assembly variations among human leukocyte antigen class I (HLA class I) allotypes
Source: eLife. 2023 Feb 1;12:e79144. doi: 10.7554/eLife.79144 (PMC9917446; doi:10.7554/eLife.79144)
Supplement: Figure 4—source data 1. — Data for Figure 4A–D. Monocytes or moDCs were treated with bafilomycin for 1 or 4 hr, followed by staining with anti-Bw6 antibody. Expression normalized to untreated cells. [file elife-79144-fig4-data1.xlsx]

## Sheet: Sheet1
Figure 4--Source Data 1
Figure 4C-D: Monocyte and moDC bafilomycin time course
Monocytes or moDCs were treated with bafilomycin for 1 or 4 hrs, followed by staining with anti-Bw6 antibody.
B*08:01 Monocytes
Donor ID	untreated		1 hr		4 hr
	mean	SEM	mean	SEM	mean	SEM
130	1	0.0138319	0.89135	0.0346792	1.12128	0.0138903
130	1	0.0241155	0.978348	0.0218988	1.179	0.0201066
121	1	0.0120414	0.912196	0.0179961	1.06374	0.0096951
237	1	0.00558368	1.01554	0.0132841	1.23935	0.00757572
B*35:01 Monocytes
Donor ID	untreated		1 hr		4 hr
	mean	SEM	mean	SEM	mean	SEM
210	1	0.0206144	0.870427	0.0127321	0.946886	0.0138245
210	1	0.0332674	0.958023	0.0238079	1.16284	0.0384224
141	1	0.0143256	0.864543	0.0820976	1.0886	0.0113245
24	1	0.018624	0.892661	0.0117698	0.927575	0.0267989
141	1	0.00142931	0.973896	0.0149255	1.06838	0.00452085
B*08:01 moDCs
Donor ID	untreated		1 hr		4 hr
	mean	SEM	mean	SEM	mean	SEM
55	1	0.00405857	1.03904	0.0184186	1.00461	0.0279372
198	1	0.0216964	0.872308	0.0238435	0.975672	0.0304121
55	1	0.0545698	1.06959	0.0414261	1.14596	0.0458466
166	1	0.00279736	0.937945	0.0164971	0.828458	0.00204328
178	1	0.0402633	0.983903	0.0322141	1.10637	0.0521302
94	1	0.179727	1.23363	0.156831	1.20822	0.155054
B*35:01 moDCs
Donor ID	untreated		1 hr		4 hr
	mean	SEM	mean	SEM	mean	SEM
24	1	0.0020762	0.903354	0.0054052	0.843794	0.00152002
24	1	0.00832854	0.892426	0.00634114	0.835489	0.0147018
187	1	0.0208202	0.863039	0.0147524	0.807132	0.0122206
210	1	0.0652624	1.00704	0.0545093	0.815686	0.0447563
