# Supplementary material for: Endo-lysosomal assembly variations among human leukocyte antigen class I (HLA class I) allotypes
Source: eLife. 2023 Feb 1;12:e79144. doi: 10.7554/eLife.79144 (PMC9917446; doi:10.7554/eLife.79144)
Supplement: Figure 4—source data 2. — Data for Figure 4F. moDCs were plated for microscopy as in Figure 3, but treated with bafilomycin for 4 hr and stained for Bw6 co-localization with LAMP1. [file elife-79144-fig4-data2.xlsx]

## Sheet: Sheet1
Figure 4--Source Data 2
Figure 4F: moDC bafilomycin confocal microscopy
moDCs were plated for microscopy as in Figure 3, but treated with bafilomycin for 4 hrs and stained for Bw6 co-localization with LAMP1.
B*08:01 moDCs (LAMP1): object-based co-localization
Cell #	untreated		bafilomycin
	Donor 94	Donor 237	Donor 94	Donor 237
1	0.0772828	0.0410765	0.339757	0.300602
2	0.182303	0.0321688	0.154761	0.058557
3	0.150381	0.0178205	0.0752069	0
4	0.137222	0	0	0.0585424
5	0.337215	0.00332226	0.0627274	0.103147
6	0.0579736	0.026545	0.258868	0
7	0	0.0316869	0.30164	0.0768043
8	0.302338	0.34843	0.029782	0.0149471
9	0.456623	0.0988806	0.381095	0.0311665
10	0.0484367	0.165796	0.0128524	0.0731402
11	0.214992	0	0.050191	0.0253521
12	0.11658	0.0152749	0.118405	0.0664414
13	0	0.0232125	0	0.00538565
14	0.013842	0.156066	0.123344	0
15	0.0967818	0.00933014	0.132967	0.0421389
16	0	0.0198007	0.119002	0.0948157
17	0.0788591	0.035544	0.331262	0.0400356
18	0.0717968	0.0366214	0.266171	0
19	0.156532	0	0.0769312	0
20	0.0257848	0.113252	0.107304	0.157849
21			0.0268758	0
22			0.00716446	0.0569078
23				0
24				0.222656
25				0.216703
26				0.0947776
B*35:01 moDCs (LAMP1): object-based co-localization
Cell #	untreated		bafilomycin
	Donor 187	Donor 168	Donor 187	Donor 168
1	0.0157773	0.0221157	0	0.0196326
2	0.0180706	0.0233152	0.0116868	0
3	0	0.00690489	0.0446131	0.190883
4	0.0310697	0.106782	0.147196	0
5	0	0	0.139241	0.006206
6	0.0859073	0.030885	0.378547	0
7	0.120345	0.0149205	0.213757	0.0253913
8	0	0.00528402	0.630952	0
9	0.0331064	0.032381	0.248593	0.0917805
10	0	0	0.0342067	0
11	0	0.0431812	0	0.0392157
12	0.0525878	0.00806452	0.0273523	0
13	0.0273381	0.0132955	0	0
14	0.12635	0	0.091609	0.0684105
15	0	0.0241521	0.184904	0.0110103
16	0	0	0.218187	0.0614147
17	0.00788551	0.00254479	0.166877	0.0988776
18	0	0.0109141	0.0481213	0.166974
19	0.0569564	0	0.107602
20	0	0.0391771	0.193943
21			0.266319
