# Supplementary material for: Endo-lysosomal assembly variations among human leukocyte antigen class I (HLA class I) allotypes
Source: eLife. 2023 Feb 1;12:e79144. doi: 10.7554/eLife.79144 (PMC9917446; doi:10.7554/eLife.79144)
Supplement: Figure 4—source data 3. — Data for Figure 4G. moDCs were pulsed with specific or control peptides in the presence or absence of bafilomycin, followed by staining with the HC10 antibody. [file elife-79144-fig4-data3.xlsx]

## Sheet: Sheet1
Figure 4--Source Data 3
Figure 4G: moDC bafilomycin peptide receptivity
moDCs were pulsed with specific or control peptides in the presence or absence of bafilomycin, followed by staining with the HC10 antibody.
B*08:01
Donor ID	FLR/FLD -baf		FLR/FLD +baf
	mean	SEM	mean	SEM
9	1.03305	0.0212198	0.977548	0.00933128
130	1.02342	0.0167753	1.01296	0.0107541
166	0.994233	0.0206423	0.989434	0.00882136
121	1.01027	0.00569124	0.999069	0.00337304
105	1.01673	0.00307861	1.00783	0.0109944
178	0.995851	0.00627997	1.00969	0.00806043
148	1.00406	0.00717557	0.992328	0.00575501
B*35:01
Donor ID	HPV/HGV -baf		HPV/HGV +baf
	mean	SEM	mean	SEM
210	0.901637	0.00249726	0.807706	0.00759989
168	0.859752	0.0155032	0.807828	0.0178025
24	0.89285	0.0164598	0.869745	0.00111244
210	0.944071	0.00580558	0.922414	0.0104681
187	0.921272	0.00649844	0.854744	0.0118952
