# Supplementary material for: Endo-lysosomal assembly variations among human leukocyte antigen class I (HLA class I) allotypes
Source: eLife. 2023 Feb 1;12:e79144. doi: 10.7554/eLife.79144 (PMC9917446; doi:10.7554/eLife.79144)
Supplement: Figure 5—source data 1. — Data for Figure 5A. Monocytes or moDCs were pulsed in 15 min increments with BSA labeled with Alexa Fluor 594. AF594 signal normalized to no Ag. [file elife-79144-fig5-data1.xlsx]

## Sheet: Sheet1
Figure 5--Source Data 1
Figure 5A: Monocyte and moDC antigen uptake
Monocytes or moDCs were pulsed in 15 min increments with BSA labeled with Alexa Fluor 594. AF594 signal normalized to no Ag.
Monocytes
Donor ID	no Ag		15 min		30 min		45 min		60 min		60 min 4C
	mean	SEM	mean	SEM	mean	SEM	mean	SEM	mean	SEM	mean	SEM
PCD22F	0	0.0424264	24.7	0.351283	58.35	0.03	78.65	0.700643	112.45	3.00015	6.445	0.44601
PCD25F	0	0.0141421	18.11	0.300167	45.41	0.900056	80.21	0.01	118.81	2.50002	3.83	1.35004
moDCs
Donor ID	no Ag		15 min		30 min		45 min		60 min		60 min 4C
	mean	SEM	mean	SEM	mean	SEM	mean	SEM	mean	SEM	mean	SEM
255	0	0.212132	1276.05	1.01119	2783.05	91.0001	4157.55	26.5004	5219.55	82.5001	48.9	0.961769
PCD37M	0	0.141421	350.1	6.50077	1399.6	38.0001	2572.1	57.5001	3622.1	0.509902	42.45	1.65303
