# Supplementary material for: Endo-lysosomal assembly variations among human leukocyte antigen class I (HLA class I) allotypes
Source: eLife. 2023 Feb 1;12:e79144. doi: 10.7554/eLife.79144 (PMC9917446; doi:10.7554/eLife.79144)
Supplement: Figure 5—source data 2. — Data for Figure 5B–C. Monocytes or moDCs were pulsed with DQ-Ova antigen alone or in the presence of bafilomycin, MG132, or both. Pulses were also done at 4°C. DQ-Ova fluorescence was measured by flow cytometry and normalized to untreated (100%) and 4°C (0%). [file elife-79144-fig5-data2.xlsx]

## Sheet: Sheet1
Figure 5--Source Data 2
Figure 5B-C: Monocyte and moDC
Monocytes or moDCs were pulsed with DQ-Ova antigen alone or in the presence of bafilomycin, MG132, or both. Pulses were also done at 4C. DQ-Ova fluorescence was measure by flow cytometry and normalized to untreated (100%) and 4C (0%).
Monocytes
Donor ID	untreated		MG132		bafilomycin		MG132+bafilomycin		4C
	rep 1	rep 2	rep 1	rep 2	rep 1	rep 2	rep 1	rep 2	rep 1	rep 2
248	119.485	80.5147	155.515	174.632	7.72059	5.51471	14.3382	17.2794	-6.98529	6.98529
250	101.841	98.1586	131.303	139.235	22.5212	13.1728	23.3711	55.6657	-2.9745	2.9745
255	98.6094	101.391	94.0145	93.289	25.6953	23.7606	30.4111	20.9794	-0.544135	0.544135
270	96.2562	103.744	49.1681	35.3577	-19.7171	1.24792	-5.24126	-15.8902	-2.41265	2.41265
273	94.6331	105.367	94.8521	65.2793	-31.9825	-16.8675	-59.5838	-40.7448	0.657174	-0.657174
moDCs
Donor ID	untreated		MG132		bafilomycin		MG132+bafilomycin		4C
	rep 1	rep 2	rep 1	rep 2	rep 1	rep 2	rep 1	rep 2	rep 1	rep 2
250	108.147	91.853	120.607	150.958	88.0192	54.1534	10.3834	32.7476	-5.59105	5.59105
253	112.83	87.1698	189.057	201.132	52.8302	92.8302	-11.6981	26.0377	-9.0566	9.0566
270	93.9707	106.029	215.935	244.014	63.1352	86.5633	72.9543	77.261	-3.7037	3.7037
275	88.9119	111.088	194.093	200.518	100.829	79.6891	63.3161	50.9845	1.76166	-1.76166
