# Supplementary material for: Endo-lysosomal assembly variations among human leukocyte antigen class I (HLA class I) allotypes
Source: eLife. 2023 Feb 1;12:e79144. doi: 10.7554/eLife.79144 (PMC9917446; doi:10.7554/eLife.79144)
Supplement: Figure 6—figure supplement 2—source data 1. — Data for Figure 6—figure supplement 2A–H. CTL activation in response to peptide or BZLF1/EBNA3A is quantified as the percentage of cells double positive for CD107a and IFNγ. [file elife-79144-fig6-figsupp2-data1.xlsx]

## Sheet: Sheet1
Figure 6--Source Data 3
Figure 6--supplement 2A-H: Peptide and soluble Ag percentage of CTL activation.
CTL activation in response to peptide or BZLF1/EBNA3A is quantified as the percentage of cells double positive for CD107a and IFNgamma.
Monocyte peptide activation
APC Donor ID	B*08:01-RAK		B*35:01-EPL		B*08:01-FLR		B*35:01-YPL
	mean	SEM	mean	SEM	mean	SEM	mean	SEM
25	58.32	11.2532	59.245	1.66269
25	77.555	0.400656	92.7125	0.981864
16	45.926	1.15025	84.55	1.75
25	56.52	0.04	55.795	0.201308
132	70.69	1.35181	79.495	0.464462
16	46.3	1.7	92.334	0.250511
16	76.3	1	80.707	5.05001
16	68.0665	3.00019	90.495	0.600021
25	90.9	1.2	82.35	2.85
132	81.8565	0.800214	73.9015	0.651807
16					94.9	96.7	86.4	84.1
132					97.5	97.2	78	84.9
25					96.6	96.9	83	78.8
moDC peptide activation
APC Donor ID	B*08:01-RAK		B*35:01-EPL		B*08:01-FLR		B*35:01-YPL
	mean	SEM	mean	SEM	mean	SEM	mean	SEM
25	65.995	0.800391	84.975	1.20126
132	74.305	0.350036	92.9325	1.48688
132	84.345	0.75015	98.5215	0.0649788
16	82.3	2	96.63	0.950474
16	89.3	2.8	94.55	1.35
16	89.9165	1.15001	90.68	1.86304
132	71.46	0.880568	67.35	1.05948
16					94.8	87.3	82.6	84.6
132					85.3	85.6	55.4	46.3
25					82.2	80.4	42.3	40.6
16					95.5	95.1	75.9	74.6
16					58.9	50.1	88.7	87.9
Monocyte BZLF1 activation
APC Donor ID	B*08:01-RAK		B*35:01-EPL
	mean	SEM	mean	SEM
25	1.52	0.290259	8.2375	3.79535
16	-0.004	0.031241	9.19	8.31
25	0.11	0.145602	0.64	0.33712
132	-0.155	0.391312	5.545	0.181177
16	0.635	0.095	3.104	0.111158
16	0.0475	0.0275	14.107	0.0508035
16	0.2815	0.0484484	5.74	0.755017
25	0.425	0.035	10.6	0.2
132	0.7215	0.0395885	0.7065	0.259571
Monocyte EBNA3A activation
APC Donor ID	B*08:01-FLR		B*35:01-YPL
	mean	SEM	mean	SEM
16	5.64	5.2	16.7	17.4
132	4.17	4.9	6.05	5.42
25	5.79	5.64	11.4	12.8
moDC BZLF1 activation
APC Donor ID	B*08:01-RAK		B*35:01-EPL
	mean	SEM	mean	SEM
25	3.8	0.236326	3.585	0.0890225
132	2.9	0.235053	18.8325	1.81406
132	2.28	0.0380789	16.1715	0.501719
16	2.625	0.125	30.78	2.2002
16	1.23	0.2	11.01	1.79
16	12.4165	0.0502021	31.43	1.02391
132	3.46	0.240416	13.95	2.62345
moDC EBNA3A activation
APC Donor ID	B*08:01-FLR		B*35:01-YPL
	mean	SEM	mean	SEM
16	2.87	1.75	69.9	68.9
132	4.07	6.06	42.9	51.3
25	0.65	3.45	58.5	59.4
16	0.78	0.3	57.8	61.1
16	0.99	0.65	82.4	85.1
