# Supplementary material for: Endo-lysosomal assembly variations among human leukocyte antigen class I (HLA class I) allotypes
Source: eLife. 2023 Feb 1;12:e79144. doi: 10.7554/eLife.79144 (PMC9917446; doi:10.7554/eLife.79144)
Supplement: Figure 6—source data 1. — Data for Figure 6A. B*08:01 or B*35:01 peripheral blood mononuclear cells were pulsed with tenfold increments of peptide, followed by co-culture with Ag-specific CTLs for 5 hr. CTLs were stained for surface CD107a degranulation and intracellular IFNγ. Data normalized to 100 µM concentration. [file elife-79144-fig6-data1.xlsx]

## Sheet: Sheet1
Figure 6--Source Data 1
Figure 6A: CTL peptide titration
B*08:01 or B*35:01 PBMCs were pulsed with 10-fold increments of peptide, followed by co-culture with Ag-specific CTLs for 5 hrs. CTLs were stained for surface CD107a degranulation and intracellular IFNgamma. Data normalized to 100 uM concentration.
Peptide concentration	Donor 9-RAK CTL (B*08:01)			Donor 9-FLR CTL (B*08:01)			Donor 16-EPL CTL (B*35:01)			Donor 40-YPL CTL (B*35:01)
	mean	SEM	N	mean	SEM	N	mean	SEM	N	mean	SEM	N
no peptide	0.000564589	0.000301225	4	0.0028609	0.00106929	3	0.00141821	0.000497156	4	0.00123643	0.00108947	3
1 pM	0.0001372	8.09817e-05	4	0.00187439	0.00182011	3	0.00106596	0.000635267	4	0.000539076	0.000306947	3
10 pM	0.000144737	0.000144737	4	0.00174229	0.00174229	3	0.00100462	0.000594517	4	0.00023108	0.00023108	3
100 pM	0.000593285	0.000548793	4	0.00110653	0.000945027	3	0.000119422	7.07705e-05	4	0.00137276	0.000718377	3
1 nM	0.000899235	0.000602941	4	0.00158913	0.00158913	3	0.000637984	0.000279038	4	0.00268276	0.000647551	3
10 nM	0.000221039	0.000184239	4	0.00198457	0.00142075	3	0.00122028	0.000617727	4	0.0398801	0.0138222	3
100 nM	0.00106282	0.000637487	4	0.0101656	0.00200073	3	0.0183628	0.00594713	4	0.280614	0.0657069	3
1 µM	0.00917827	0.00150933	4	0.145888	0.0573749	3	0.215069	0.0586688	4	0.652395	0.0790867	3
10 µM	0.19696	0.0271719	4	0.668564	0.0844861	3	0.581737	0.0966298	4	0.890219	0.0555245	3
100 µM	1	0	4	1	0	3	1	0	4	1	0	3
