# Supplementary material for: Endo-lysosomal assembly variations among human leukocyte antigen class I (HLA class I) allotypes
Source: eLife. 2023 Feb 1;12:e79144. doi: 10.7554/eLife.79144 (PMC9917446; doi:10.7554/eLife.79144)
Supplement: Figure 6—source data 2. — Data for Figure 6C–H. Monocytes or moDCs were pulsed with antigen for 6 hr, followed by co-culture with cytotoxic T lymphocytes (CTLs) for 5 hr. CTLs were stained for activation markers, and antigen cross-presentation data was normalized to activation with peptide. [file elife-79144-fig6-data2.xlsx]

## Sheet: Sheet1
Figure 6--Source Data 2
Figure 6D-E, G-H: Monocyte and moDC cross-presentation of BZLF1 and EBNA3A
Monocytes or moDCs were pulsed with antigen for 6 hrs, followed by co-culture with CTLs for 5 hrs. CTLs were stained for activation markers and antigen cross-presentation data was normalized to activation with peptide.
Monocyte BZLF1 cross-presentation
APC Donor ID	Donor 9-RAK CTLs (B*08:01)		Donor 16-EPL CTLs (B*35:01)
	mean	SEM	mean	SEM
25	0.0181756	0.0077585
25	0.019599	0.00374398	0.0888499	0.0409476
16	-8.70966e-05	0.00068025	0.108693	0.0983108
25	0.00194621	0.00257612	0.0114706	0.00604226
132	-0.00219267	0.00553576
16	0.0137149	0.00211273	0.0697528	0.00231525
16	0.000622543	0.000360512	0.0336171	0.00120731
16	0.00413566	0.000734752	0.174793	0.0109553
25	0.00467547	0.000389954	0.0634289	0.00835378
132	0.00881421	0.000491249	0.128719	0.00507378
Monocyte EBNA3A cross-presentation
APC Donor ID	Donor 9-FLR CTLs (B*08:01)		Donor 40-YPL CTLs (B*35:01)
	mean	SEM	mean	SEM
16	0.0563989	0.00236473	0.199822	0.00491248
132	0.046511	0.00375112	0.0690111	0.00490658
25	0.0590698	0.000780585	0.149194	0.00949436
16	0.0137553	0.00712883	0.0155865	0.00477688
132			0.163005	0.033166
moDC BZLF1 cross-presentation
APC Donor ID	Donor 9-RAK CTLs (B*08:01)		Donor 16-EPL CTLs (B*35:01)
	mean	SEM	mean	SEM
25	0.0575801	0.00364843	0.0421889	0.0012055
132	0.0471279	0.0335811
132			0.042105	0.00201307
132	0.0390283	0.00316869	0.202647	0.0197876
132	0.0270318	0.000511489	0.164142	0.00509364
16	0.0318955	0.00170518	0.318535	0.0229839
16	0.0137738	0.0022809	0.116446	0.0190047
16	0.138089	0.00185227	0.346603	0.0133494
132	0.0484187	0.00341684	0.207127	0.0390886
moDC EBNA3A cross-presentation
APC Donor ID	Donor 9-FLR CTLs (B*08:01)		Donor 40-YPL CTLs (B*35:01)
	mean	SEM	mean	SEM
16	0.0253707	0.0062386	0.829767	0.0116725
132	0.0592744	0.0116447	0.926254	0.117009
25	0.00464707	0.0274666	1.4222	0.0311196
16	0.00550368	0.00252035	0.789947	0.0229736
16	0.0143767	0.00339907	0.947695	0.0161472
