# Supplementary material for: Endo-lysosomal assembly variations among human leukocyte antigen class I (HLA class I) allotypes
Source: eLife. 2023 Feb 1;12:e79144. doi: 10.7554/eLife.79144 (PMC9917446; doi:10.7554/eLife.79144)
Supplement: Figure 7—source data 1. — Data for Figure 7D–E. Cross-presentation was performed as in Figure 6, except during antigen pulse the inhibitors MG132, lactacystin, or cathepsin inhibitor I were added. Data is normalized to untreated cross-presentation. [file elife-79144-fig7-data1.xlsx]

## Sheet: Sheet1
Figure 7--Source Data 1
Figure 7D-E: Monocyte and moDC cross-presentation with pathway inhibitors
Cross-presentation was performed as in Figure 6, except during antigen pulse the inhibitors MG132, lactacystin, or Cathepsin Inhibitor I (CTI1) were added. Data is normalized to untreated cross-presentation.
Monocyte B*08:01-RAK
APC Donor ID	untreated		CTI1		MG132
	mean	SEM	mean	SEM	mean	SEM
25	1	0.682724			0.293103	0.325471
132	1	0.541763			0.0945274	0.101226
16	1	0.211575			0.299213	0.0547341
16	1	0.818755			0.389474	0.275271
16	1	0.157135	1.25397	0.140231
25	1	0.116465	0.458824	0.203538
132	1	0.0647026	0.464052	0.190728
Monocyte B*35:01-EPL
APC Donor ID	untreated		CTI1		MG132		lactacystin
	mean	SEM	mean	SEM	mean	SEM	mean	SEM
25	1	0.390863			2.9196	0.816645
16	1	0.0335576			1.12373	0.0356941
16	1	0.0498601			0.775641	0.0374871
16	1	0.00499722	0.703887	0.0523559
25	1	0.182674	0.0538922	0.0161226
132	1	0.0266833	0.0933962	0.0114571
25	1	0.477648	0.166887	0.124722
25	1	0.00949137					0.442207	0.0843177
25	1	0.0190987					0.455305	0.0289562
132	1	0.0809483					0.521549	0.03478
16	1	0.0662913					0.326953	0.0173832
Monocyte B*08:01-FLR
APC Donor ID	untreated		CTI1		MG132		lactacystin
	mean	SEM	mean	SEM	mean	SEM	mean	SEM
132	1	0.113823	0.647189	0.066162	1.83903	0.280397
25	1	0.0185592	0.857393	0.0951558	1.29134	0.0219805
16	1	0.667823	0.597222	0.359053	0.729167	0.446799
25	1	0.0255801					0.686047	0.0406977
25	1	0.199915					0.35445	0.0533512
132	1	0.0393832					0.021519	0.000967443
16	1	0.0589256					0.172222	0.0327405
Monocyte B*35:01-YPL
APC Donor ID	untreated		CTI1		MG132		lactacystin
	mean	SEM	mean	SEM	mean	SEM	mean	SEM
132	1	0.0776769	0.327812	0.0788063	0.594595	0.0328443
25	1	0.081814	0.417769	0.0273534	0.229339	0.0581455
16	1	0.422699	0.321033	0.143731	0.273063	0.115116
132	1	0.281206	0.696982	0.142106	0.18148	0.0486698
25	1	0.00102703					0.880174	0.00440393
25	1	0.0253361					0.664495	0.0128683
132	1	0.0118415					0.470694	0.00871698
16	1	0.0292435					0.344913	0.0143109
moDC B*08:01-RAK
APC Donor ID	untreated		CTI1		MG132
	mean	SEM	mean	SEM	mean	SEM
25	1	0.0829813			0.0299625	0.00305374
132	1	0.892259			0.319202	0.213153
132	1	0.102416			0.0312789	0.00346301
132	1	0.0199185			0.251509	0.0745309
16	1	0.0673435			0.0838095	0.0345172
16	1	0.229953	2.00813	0.527769
16	1	0.00567957	0.285141	0.0026679
132	1	0.019999	0.352525	0.0357033
moDC B*35:01-EPL
APC Donor ID	untreated		CTI1		MG132		lactacystin
	mean	SEM	mean	SEM	mean	SEM	mean	SEM
25	1	0.0259829			0.192913	0.00377949
132	1	0.0639594			0.0665829	0.0315511
132	1	0.11043			0.105542	0.0220046
132	1	0.0433808			0.18773	0.0378638
16	1	0.100364			0.154355	0.0243744
16	1	0.229922	0.744777	0.183633
16	1	0.0443327	0.201254	0.020434
132	1	0.25713	0.354545	0.15846
24	1	0.417142	0.399281	0.148181
25	1	0.0537043					0.500844	0.0300048
25	1	0.0968639					0.687671	0.0531646
moDC B*08:01-FLR
APC Donor ID	untreated		CTI1		MG132		lactacystin
	mean	SEM	mean	SEM	mean	SEM	mean	SEM
16	1	0.34284	0.24026	0.0629234	0.313853	0.0827233
132	1	0.277817	1.81244	0.363463	0.794669	0.328679
25	1	0.965804	2.01463	1.38523	0.680488	0.486493
16	1	0.628539	3.86111	1.75754	0.990741	0.445074
16	1	0.293191	1.0061	0.21568	0.993902	0.323972
94	1	0.151033					0.213592	0.035487
25	1	0.236578					0.921933	0.155831
moDC B*35:01-YPL
APC Donor ID	untreated		CTI1		MG132		lactacystin
	mean	SEM	mean	SEM	mean	SEM	mean	SEM
16	1	0.0101889	0.861671	0.0308896	0.800432	0.0686863
132	1	0.126108	1.18259	0.167014	0.674098	0.0997611
25	1	0.0107955	0.800679	0.0196354	0.531807	0.0603572
16	1	0.0392507	0.818335	0.0298336	0.387721	0.0107938
16	1	0.0227963	0.903881	0.0240264	0.60597	0.0263546
187	1	0.0115555					0.774984	0.0181134
25	1	0.0240036					0.896747	0.0333756
