# Supplementary material for: Endo-lysosomal assembly variations among human leukocyte antigen class I (HLA class I) allotypes
Source: eLife journal article supplement (doi:10.7554/elife.79144), 2023-01-23
Supplement: supp [file elife_poa_e79144_Figure_2_source_data_1.xlsx]

## Sheet: Sheet1
Figure 2--Source Data 1
Figure 2A-B: moDC HLA-B half-life
moDCs were incubated with Brefeldin A for various time points, followed by staining with Bw6 antibody. Sample data in (A) normalized to 0.25 hr. Data in (B) analyzed as described in methods to determine half-life.
moDC surface HLA-B decay with BFA
time (hrs)	Donor 237		Donor 24		Donor 9		Donor 187		Donor 121		Donor 198		Donor 187
	mean	SEM	mean	SEM	mean	SEM	mean	SEM	mean	SEM	mean	SEM	mean	SEM
0.25	100	3.24835	100	5.02583	100	2.42093	100	0.695855	100	0.552698	100	0.771324	100	1.66394
0.5	102.882	2.66297	95.2683	7.09171	101.973	4.35621	94.3369	0.464179	100.733	1.60377	102.114	0.727514	94.2798	1.22495
1	96.7385	2.23824	87.1713	4.69113	92.5324	2.8798	85.3404	0.47784	90.2288	0.563762	105.462	0.614321	50.959	14.3548
1.5	87.1934	2.25446	77.4449	3.42571	86.4612	1.4801	77.4276	0.807407	87.2626	2.17023	94.6019	2.77042	86.099	1.17826
2	82.9153	1.92404	71.4143	2.81597	86.0947	1.96034	71.9576	1.30821	79.6775	1.73316	94.8644	1.44983	82.8679	1.25199
4	71.1171	1.89589	65.8529	4.30345	71.3738	1.76241	61.1224	0.433553	65.9071	0.711555	90.8257	1.82286	73.4664	1.42234
moDC surface HLA-B half-life
Donor ID	B*08:01 (hr)	B*35:01 (hr)
9	3.24
198	1.62
237	2.3
121	3.147
24		0.85
187		1.69
187		1.195
