# Supplementary material for: Endo-lysosomal assembly variations among human leukocyte antigen class I (HLA class I) allotypes
Source: eLife journal article supplement (doi:10.7554/elife.79144), 2023-01-23
Supplement: supp [file elife_poa_e79144_Figure_3_source_data_3.xlsx]

## Sheet: Sheet1
Figure 3--Source Data 3
Figure 3--supplement 2: Cell type comparison of surface HLA-B half-life
moDC half-life data is compared to lymphocyte data from Yarzabek et al. 2018.
B*08:01
Donor ID	moDCs			Monocytes			B cells			NK cells			CD4 T cells			CD8 T cells
	mean	SEM	N	mean	SEM	N	mean	SEM	N	mean	SEM	N	mean	SEM	N	mean	SEM	N
198	1.62		1				14.17	2.97	3	11.17	1.56	2	16.58	5.89	2	16.55	6.3	2
237	2.3		1
28				5.06		1	20.09	2.21	4	25.37	9.27	4	16.53	1.3	4	27.13	4.1	4
55							21.01	6.09	4	10.8	0.15	4	13.63	1.1	4	19.43	4.16	4
94				13.56		1	37.43	9.48	5	14.86	2.46	6	26.61	4.89	6	22.97	4.98	6
121	3.147		1				45.98	21.35	2	19.19	7.85	2	18.32	2.62	2	20.62	7.24	2
137				7.24	0.9	2	20.06	1.23	7	15.31	2.38	5	18.68	1.88	7	20.39	5.44	6
178				7.74	1.39	2	19.31	2.83	4	20.25	8.62	3	26.88	4.01	4	29.7	5.44	4
9	3.24		1
B*35:01
Donor ID	moDCs			Monocytes			B cells			NK cells			CD4 T cells			CD8 T cells
	mean	SEM	N	mean	SEM	N	mean	SEM	N	mean	SEM	N	mean	SEM	N	mean	SEM	N
24	0.85		1	8.19	1.63	2	15.33	1.87	4	8.29	0.5	4	13.64	1.68	4	11.25	1.2	4
111							16.64	0.64	2	9.32	1.97	2	10.81	1.15	2	10.83	0.35	2
141				10.69	1.05	2	14.98	1.99	4	7.42	0.56	4	10.53	1.18	4	8.11	0.81	4
187	1.4425	0.2475	2	9.37	1.2	2	13.52	1.99	4	5.77	0.24	4	9.56	0.52	4	8.41	0.29	4
Combined
Donor ID	moDCs			Monocytes			B cells			NK cells			CD4 T cells			CD8 T cells
	mean	SEM	N	mean	SEM	N	mean	SEM	N	mean	SEM	N	mean	SEM	N	mean	SEM	N
198	1.62		1				14.17	2.97	3	11.17	1.56	2	16.58	5.89	2	16.55	6.3	2
237	2.3		1
28				5.06		1	20.09	2.21	4	25.37	9.27	4	16.53	1.3	4	27.13	4.1	4
55							21.01	6.09	4	10.8	0.15	4	13.63	1.1	4	19.43	4.16	4
94				13.56		1	37.43	9.48	5	14.86	2.46	6	26.61	4.89	6	22.97	4.98	6
121	3.147		1				45.98	21.35	2	19.19	7.85	2	18.32	2.62	2	20.62	7.24	2
137				7.24	0.9	2	20.06	1.23	7	15.31	2.38	5	18.68	1.88	7	20.39	5.44	6
178				7.74	1.39	2	19.31	2.83	4	20.25	8.62	3	26.88	4.01	4	29.7	5.44	4
24	0.85		1	8.19	1.63	2	15.33	1.87	4	8.29	0.5	4	13.64	1.68	4	11.25	1.2	4
111							16.64	0.64	2	9.32	1.97	2	10.81	1.15	2	10.83	0.35	2
141				10.69	1.05	2	14.98	1.99	4	7.42	0.56	4	10.53	1.18	4	8.11	0.81	4
187	1.4425	0.2475	2	9.37	1.2	2	13.52	1.99	4	5.77	0.24	4	9.56	0.52	4	8.41	0.29	4
9	3.24		1
